# Supplementary material
Source: publisher site journal article supplement (https://www.dovepress.com/article/463571)
Supplement: Supplementary file 1 [file get_supplementary_file.php]

**Supplementary materials**

**Supplementary Table S1 – Stratified incidence rates and hazard ratios for Parkinson’s disease, comparing frozen shoulder cohort to general population cohort.**

|  | **Follow-up period** | **No. of incident Parkinson’s disease diagnoses a** | **Incidence Rate (per 1000PYRs) (95% CI)** | **Unadjusted Hazard Ratio (95% CI)** | **Adjusted Hazard Ratio (95% CI) b** |
| --- | --- | --- | --- | --- | --- |
| **Female** | **General Population cohort** | | | | |
| 0-1 year | 50 | 0.24 (0.18-0.31) | - | - |
| 1-3 years | 105 | 0.30 (0.24-0.36) | - | - |
| 3-6 years | 125 | 0.33 (0.27-0.39) | - | - |
| 6-10 years | 110 | 0.34 (0.28-0.41) | - | - |
| 10-22 years | 145 | 0.49 (0.41-0.57) | - | - |
| 1-22 years | 480 | 0.36 (0.33-0.39) | - | - |
| 0-22 years | 530 | 0.34 (0.32-0.37) | - | - |
| **Frozen shoulder cohort** | | | | |
| 0-1 year | 10 | 0.40 (0.17-0.71) | 1.72 (0.81–3.65) | 1.49 (0.68–3.26) |
| 1-3 years | 25 | 0.66 (0.42-0.96) | 2.24 (1.42–3.53) | 2.28 (1.44–3.63) |
| 3-6 years | 15 | 0.39 (0.22-0.61) | 1.18 (0.69–2.02) | 1.11 (0.64–1.93) |
| 6-10 years | 15 | 0.53 (0.31-0.81) | 1.63 (0.96–2.76) | 1.56 (0.91–2.67) |
| 10-22 years | 15 | 0.55 (0.31-0.85) | 1.07 (0.63–1.82) | 1.10 (0.65–1.87) |
| 1-22 years | 70 | 0.53 (0.41-0.66) | 1.47 (1.14–1.90) | 1.45 (1.13–1.88) |
| 0-22 years | 80 | 0.51 (0.40-0.63) | 1.50 (1.18–1.90) | 1.46 (1.15–1.86) |
| **Male** | **General Population cohort** | | | | |
| 0-1 year | 55 | 0.35 (0.26-0.45) | - | - |
| 1-3 years | 145 | 0.55 (0.46-0.64) | - | - |
| 3-6 years | 165 | 0.57 (0.49-0.67) | - | - |
| 6-10 years | 150 | 0.67 (0.57-0.78) | - | - |
| 10-22 years | 190 | 0.98 (0.85-1.13) | - | - |
| 1-22 years | 645 | 0.67 (0.62-0.72) | - | - |
| 0-22 years | 700 | 0.63 (0.58-0.67) | - | - |
| **Frozen shoulder cohort** | | | | |
| 0-1 year | 15 | 0.85 (0.45-1.37) | 2.42 (1.32–4.43) | 2.45 (1.31–4.58) |
| 1-3 years | 20 | 0.80 (0.50-1.18) | 1.48 (0.93–2.34) | 1.45 (0.91–2.31) |
| 3-6 years | 15 | 0.56 (0.32-0.87) | 1.00 (0.60–1.68) | 0.96 (0.57–1.62) |
| 6-10 years | 25 | 1.10 (0.71-1.57) | 1.68 (1.09–2.58) | 1.66 (1.07–2.57) |
| 10-22 years | 30 | 1.62 (1.09-2.25) | 1.54 (1.03–2.31) | 1.40 (0.93–2.13) |
| 1-22 years | 90 | 0.96 (0.77-1.16) | 1.42 (1.14–1.78) | 1.36 (1.09–1.71) |
| 0-22 years | 105 | 0.94 (0.77-1.13) | 1.50 (1.22–1.85) | 1.44 (1.16–1.78) |
| **Age 40-59** | **General population cohort** | | | | |
| 0-1 year | 30 | 0.12 (0.08-0.17) | - | - |
| 1-3 years | 60 | 0.14 (0.11-0.18) | - | - |
| 3-6 years | 70 | 0.15 (0.12-0.19) | - | - |
| 6-10 years | 85 | 0.22 (0.17-0.26) | - | - |
| 10-22 years | 170 | 0.45 (0.39-0.52) | - | - |
| 1-22 years | 390 | 0.23 (0.21-0.26) | - | - |
| 0-22 years | 415 | 0.22 (0.20-0.24) | - | - |
| **Frozen shoulder cohort** | | | | |
| 0-1 year | 5 | 0.16 (0.04-0.36) | 1.45 (0.51–4.15) | 0.93 (0.28–3.09) |
| 1-3 years | 10 | 0.19 (0.08-0.34) | 1.31 (0.62–2.73) | 1.29 (0.61–2.73) |
| 3-6 years | 10 | 0.23 (0.12-0.39) | 1.49 (0.79–2.82) | 1.26 (0.65–2.47) |
| 6-10 years | 15 | 0.35 (0.19-0.55) | 1.59 (0.90–2.81) | 1.57 (0.88–2.79) |
| 10-22 years | 25 | 0.67 (0.43-0.95) | 1.48 (0.96–2.26) | 1.37 (0.89–2.12) |
| 1-22 years | 60 | 0.35 (0.26-0.44) | 1.48 (1.12–1.95) | 1.38 (1.04–1.83) |
| 0-22 years | 60 | 0.32 (0.25-0.41) | 1.48 (1.13–1.93) | 1.35 (1.02–1.77) |
| **Age 60-69** | **General population cohort** | | | | |
| 0-1 year | 30 | 0.38 (0.25-0.53) | - | - |
| 1-3 years | 70 | 0.56 (0.43-0.69) | - | - |
| 3-6 years | 100 | 0.76 (0.62-0.91) | - | - |
| 6-10 years | 105 | 1.04 (0.85-1.24) | - | - |
| 10-22 years | 120 | 1.52 (1.26-1.81) | - | - |
| 1-22 years | 395 | 0.90 (0.81-0.99) | - | - |
| 0-22 years | 425 | 0.83 (0.75-0.91) | - | - |
| **Frozen shoulder cohort** | | | | |
| 0-1 year | 10 | 1.08 (0.47-1.95) | 2.95 (1.33–6.52) | 3.04 (1.35–6.86) |
| 1-3 years | 25 | 1.82 (1.15-2.63) | 3.13 (1.95–5.03) | 3.10 (1.92–5.01) |
| 3-6 years | 10 | 0.74 (0.36-1.27) | 0.99 (0.51–1.90) | 0.99 (0.51–1.91) |
| 6-10 years | 15 | 1.37 (0.75-2.18) | 1.39 (0.79–2.46) | 1.31 (0.74–2.34) |
| 10-22 years | 15 | 2.11 (1.20-3.26) | 1.24 (0.72–2.14) | 1.18 (0.68–2.06) |
| 1-22 years | 65 | 1.43 (1.10-1.81) | 1.57 (1.20–2.06) | 1.52 (1.15–2.00) |
| 0-22 years | 70 | 1.38 (1.08-1.72) | 1.66 (1.28–2.15) | 1.61 (1.25–2.09) |
| **Age 70-79** | **General population cohort** | | | | |
| 0-1 year | 30 | 1.02 (0.68-1.42) | - | - |
| 1-3 years | 90 | 1.85 (1.48-2.25) | - | - |
| 3-6 years | 85 | 1.75 (1.40-2.13) | - | - |
| 6-10 years | 65 | 1.68 (1.29-2.12) | - | - |
| 10-22 years | 40 | 1.50 (1.07-2.00) | - | - |
| 1-22 years | 280 | 1.72 (1.52-1.93) | - | - |
| 0-22 years | 305 | 1.62 (1.44-1.80) | - | - |
| **Frozen shoulder cohort** | | | | |
| 0-1 year | 10 | 2.82 (1.21-5.08) | 2.46 (1.07–5.63) | 2.32 (0.97–5.52) |
| 1-3 years | 10 | 1.90 (0.87-3.33) | 1.01 (0.51–2.02) | 1.00 (0.50–2.01) |
| 3-6 years | 10 | 1.62 (0.70-2.92) | 0.93 (0.44–1.93) | 0.87 (0.41–1.83) |
| 6-10 years | 15 | 3.92 (2.14-6.22) | 2.18 (1.17–4.06) | 2.16 (1.14–4.06) |
| 10-22 years | 5 | 2.13 (0.68-4.35) | 1.08 (0.39–2.97) | 0.73 (0.23–2.32) |
| 1-22 years | 35 | 2.31 (1.62-3.12) | 1.25 (0.87–1.79) | 1.23 (0.85–1.76) |
| 0-22 years | 45 | 2.39 (1.73-3.14) | 1.37 (0.98–1.90) | 1.34 (0.96–1.87) |
| **Age 80 and above** | **General population cohort** | | | | |
| 0-1 year | 15 | 1.54 (0.86-2.41) | - | - |
| 1-3 years | 30 | 1.83 (1.21-2.56) | - | - |
| 3-6 years | 25 | 1.91 (1.26-2.69) | - | - |
| 6-10 years | 5 | 0.81 (0.33-1.51) | - | - |
| 10-22 years | 5 | 0.92 (0.18-2.20) | - | - |
| 1-22 years | 65 | 1.57 (1.21-1.97) | - | - |
| 0-22 years | 80 | 1.57 (1.24-1.93) | - | - |
| **Frozen shoulder cohort** | | | | |
| 0-1 year | 0 | - | 0.74 (0.10–5.69) | 1.10 (0.13–9.60) |
| 1-3 years | 5 | 2.59 (0.70-5.67) | 1.39 (0.47–4.07) | 1.53 (0.50–4.69) |
| 3-6 years | 0 | - | 0.86 (0.19–3.77) | 0.94 (0.20–4.35) |
| 6-10 years | 0 | - | - | - |
| 10-22 years | 0 | - | - | - |
| 1-22 years | 5 | 1.42 (0.52-2.75) | 1.03 (0.43–2.46) | 1.05 (0.44–2.53) |
| 0-22 years | 5 | 1.35 (0.54-2.51) | 0.97 (0.44–2.16) | 1.00 (0.45–2.23) |

Abbreviations: Person-years (PYRs); Confidence interval (CI).

a Rounded to nearest 5.

b Adjusted for chronic obstructive pulmonary disease, autoimmune disease, thyroid disease, dementia, and diabetes.

**Supplementary Table S2 – Stratified incidence rates and hazard ratios for Parkinson’s disease, comparing frozen shoulder cohort to back pain cohort.**

|  | **Follow-up period** | **No. of incident Parkinson’s disease diagnoses a** | **Incidence Rate (per 1000PYRs) (95% CI)** | **Unadjusted Hazard Ratio (95% CI)** | **Adjusted Hazard Ratio (95% CI) b** |
| --- | --- | --- | --- | --- | --- |
| **Female** | **Back pain cohort** | | | | |
| 0-1 year | 30 | 0.52 (0.35-0.71) | - | - |
| 1-3 years | 55 | 0.55 (0.42-0.70) | - | - |
| 3-6 years | 45 | 0.42 (0.31-0.55) | - | - |
| 6-10 years | 50 | 0.54 (0.40-0.70) | - | - |
| 10-22 years | 50 | 0.61 (0.45-0.79) | - | - |
| 1-22 years | 200 | 0.52 (0.45-0.60) | - | - |
| 0-22 years | 235 | 0.52 (0.46-0.59) | - | - |
| **Frozen shoulder cohort** | | | | |
| 0-1 year | 10 | 0.40 (0.17-0.71) | 0.78 (0.36–1.71) | 0.78 (0.34–1.79) |
| 1-3 years | 25 | 0.66 (0.42-0.96) | 1.20 (0.74–1.96) | 1.28 (0.77–2.14) |
| 3-6 years | 15 | 0.39 (0.22-0.61) | 0.89 (0.48–1.64) | 0.87 (0.47–1.62) |
| 6-10 years | 15 | 0.53 (0.31-0.81) | 0.95 (0.54–1.67) | 0.98 (0.54–1.76) |
| 10-22 years | 15 | 0.55 (0.31-0.85) | 0.71 (0.38–1.35) | 0.86 (0.41–1.79) |
| 1-22 years | 70 | 0.53 (0.41-0.66) | 0.95 (0.72–1.26) | 0.98 (0.73–1.31) |
| 0-22 years | 80 | 0.51 (0.40-0.63) | 0.93 (0.71–1.21) | 0.95 (0.72–1.25) |
| **Male** | **Back pain cohort** | | | | |
| 0-1 year | 40 | 0.88 (0.63-1.17) | - | - |
| 1-3 years | 60 | 0.77 (0.59-0.98) | - | - |
| 3-6 years | 70 | 0.87 (0.68-1.08) | - | - |
| 6-10 years | 55 | 0.85 (0.64-1.09) | - | - |
| 10-22 years | 65 | 1.19 (0.92-1.50) | - | - |
| 1-22 years | 250 | 0.90 (0.79-1.01) | - | - |
| 0-22 years | 290 | 0.90 (0.80-1.00) | - | - |
| **Frozen shoulder cohort** | | | | |
| 0-1 year | 15 | 0.85 (0.45-1.37) | 0.93 (0.50–1.74) | 0.94 (0.49–1.79) |
| 1-3 years | 20 | 0.80 (0.50-1.18) | 0.99 (0.60–1.64) | 1.00 (0.60–1.68) |
| 3-6 years | 15 | 0.56 (0.32-0.87) | 0.66 (0.38–1.16) | 0.63 (0.35–1.12) |
| 6-10 years | 25 | 1.10 (0.71-1.57) | 1.41 (0.83–2.40) | 1.53 (0.89–2.62) |
| 10-22 years | 30 | 1.62 (1.09-2.25) | 1.55 (0.95–2.53) | 1.57 (0.94–2.62) |
| 1-22 years | 90 | 0.96 (0.77-1.16) | 1.10 (0.85–1.42) | 1.11 (0.86–1.44) |
| 0-22 years | 105 | 0.94 (0.77-1.13) | 1.07 (0.85–1.36) | 1.08 (0.86–1.38) |
| **Age 40-59** | **Back pain cohort** | | | | |
| 0-1 year | 20 | 0.25 (0.15-0.38) | - | - |
| 1-3 years | 10 | 0.07 (0.03-0.13) | - | - |
| 3-6 years | 30 | 0.20 (0.14-0.29) | - | - |
| 6-10 years | 45 | 0.37 (0.27-0.49) | - | - |
| 10-22 years | 70 | 0.65 (0.51-0.81) | - | - |
| 1-22 years | 150 | 0.31 (0.26-0.36) | - | - |
| 0-22 years | 170 | 0.30 (0.26-0.35) | - | - |
| **Frozen shoulder cohort** | | | | |
| 0-1 year | 5 | 0.16 (0.04-0.36) | 0.64 (0.21–1.94) | 0.55 (0.16–1.86) |
| 1-3 years | 10 | 0.19 (0.08-0.34) | 2.60 (1.00–6.76) | 2.41 (0.87–6.63) |
| 3-6 years | 10 | 0.23 (0.12-0.39) | 1.17 (0.58–2.36) | 1.42 (0.64–3.17) |
| 6-10 years | 15 | 0.35 (0.19-0.55) | 1.06 (0.57–1.96) | 1.04 (0.55–1.97) |
| 10-22 years | 25 | 0.67 (0.43-0.95) | 1.07 (0.66–1.74) | 1.26 (0.74–2.14) |
| 1-22 years | 60 | 0.35 (0.26-0.44) | 1.19 (0.87–1.63) | 1.28 (0.92–1.79) |
| 0-22 years | 60 | 0.32 (0.25-0.41) | 1.13 (0.84–1.52) | 1.18 (0.86–1.62) |
| **Age 60-69** | **Back pain cohort** | | | | |
| 0-1 year | 20 | 0.87 (0.52-1.30) | - | - |
| 1-3 years | 60 | 1.62 (1.23-2.06) | - | - |
| 3-6 years | 45 | 1.21 (0.89-1.59) | - | - |
| 6-10 years | 40 | 1.51 (1.09-2.00) | - | - |
| 10-22 years | 30 | 1.54 (1.04-2.12) | - | - |
| 1-22 years | 180 | 1.45 (1.25-1.68) | - | - |
| 0-22 years | 195 | 1.37 (1.18-1.56) | - | - |
| **Frozen shoulder cohort** | | | | |
| 0-1 year | 10 | 1.08 (0.47-1.95) | 1.27 (0.55–2.92) | 1.26 (0.53–3.03) |
| 1-3 years | 25 | 1.82 (1.15-2.63) | 1.14 (0.70–1.85) | 1.09 (0.66–1.79) |
| 3-6 years | 10 | 0.74 (0.36-1.27) | 0.59 (0.29–1.17) | 0.56 (0.28–1.12) |
| 6-10 years | 15 | 1.37 (0.75-2.18) | 1.01 (0.53–1.91) | 1.11 (0.57–2.16) |
| 10-22 years | 15 | 2.11 (1.20-3.26) | 1.28 (0.62–2.63) | 1.09 (0.49–2.43) |
| 1-22 years | 65 | 1.43 (1.10-1.81) | 0.97 (0.72–1.32) | 0.97 (0.71–1.32) |
| 0-22 years | 70 | 1.38 (1.08-1.72) | 1.00 (0.76–1.33) | 1.00 (0.75–1.34) |
| **Age 70-79** | **Back pain cohort** | | | | |
| 0-1 year | 30 | 3.71 (2.52-5.13) | - | - |
| 1-3 years | 35 | 2.74 (1.93-3.69) | - | - |
| 3-6 years | 40 | 3.01 (2.15-4.01) | - | - |
| 6-10 years | 20 | 2.09 (1.26-3.13) | - | - |
| 10-22 years | 10 | 2.13 (1.10-3.50) | - | - |
| 1-22 years | 110 | 2.60 (2.13-3.11) | - | - |
| 0-22 years | 140 | 2.79 (2.34-3.27) | - | - |
| **Frozen shoulder cohort** | | | | |
| 0-1 year | 10 | 2.82 (1.21-5.08) | 0.65 (0.28–1.48) | 0.75 (0.31–1.80) |
| 1-3 years | 10 | 1.90 (0.87-3.33) | 0.68 (0.33–1.43) | 0.76 (0.35–1.65) |
| 3-6 years | 10 | 1.62 (0.70-2.92) | 0.57 (0.24–1.32) | 0.56 (0.22–1.42) |
| 6-10 years | 15 | 3.92 (2.14-6.22) | 2.58 (1.05–6.35) | 3.41 (1.13–10.35) |
| 10-22 years | 5 | 2.13 (0.68-4.35) | 0.77 (0.18–3.26) | 0.27 (0.02–3.24) |
| 1-22 years | 35 | 2.31 (1.62-3.12) | 0.90 (0.59–1.37) | 0.90 (0.59–1.39) |
| 0-22 years | 45 | 2.39 (1.73-3.14) | 0.84 (0.57–1.22) | 0.83 (0.57–1.22) |
| **Age 80 and above** | **Back pain cohort** | | | | |
| 0-1 year | 5 | 1.07 (0.22-2.58) | - | - |
| 1-3 years | 10 | 2.38 (1.14-4.07) | - | - |
| 3-6 years | 5 | 1.12 (0.30-2.46) | - | - |
| 6-10 years | 0 | - | - | - |
| 10-22 years | 0 | - | - | - |
| 1-22 years | 15 | 1.36 (0.74-2.15) | - | - |
| 0-22 years | 15 | 1.30 (0.75-1.98) | - | - |
| **Age 80 and above – Frozen shoulder cohort** | | | | |
| 0-1 year | 0 | - | 0.90 (0.09–8.68) | 1.00 (0.06–15.99) |
| 1-3 years | 5 | 2.59 (0.70-5.67) | 1.14 (0.34–3.84) | 1.22 (0.30–4.91) |
| 3-6 years | 0 | - | - | - |
| 6-10 years | 0 | - | - | - |
| 10-22 years | 0 | - | - | - |
| 1-22 years | 5 | 1.42 (0.52-2.75) | 1.34 (0.43–4.17) | 1.49 (0.40–5.51) |
| 0-22 years | 5 | 1.35 (0.54-2.51) | 1.23 (0.45–3.37) | 1.36 (0.46–3.98) |

Abbreviations: Person-years (PYRs); Confidence interval (CI).

a Rounded to nearest 5.

b Adjusted for chronic obstructive pulmonary disease, autoimmune disease, thyroid disease, dementia, and diabetes.

**Supplementary Appendix - Diagnosis and surgery codes**

| **Disease category** | **ICD-8 (and surgery codes)** | **ICD-10 (and NOMESCO surgery codes)** |
| --- | --- | --- |
| Frozen shoulder | 726.2 | M75.0 |
| Back pain |  | M54 |
| Parkinson’s disease | 332 | G20-22 |
|  |  |  |
| Chronic obstructive pulmonary disease | 490-493, 515-518 | J40-J47, J60-J67, J684, J701, J70.3, J84.1, J92.0, J96.1, J98.2-J98.3 |
| Myocardial infarction | 410 | I21-I23 |
| Stroke | 433-434, 431, 430, 435 | I63, I64, G45.8, G45.9, I74 |
| Thyroid disease | 244.9, 242.9 | E03, E05 |
| Shoulder trauma | 810.09-812.99, 840.00-840.99, 849.00-849.09 | M75 (excluding M75.0) |
| Shoulder surgery (surgery codes) | 700.00-700.09, 701.00-701.09, 702.00-702.09 703.00-703.09, 704.00-704.09, 705.00-705.09, 706.00-706.09 | KNB |
| Autoimmune disease | 710-718, 735, 446, 135.99, 696, 341, 291, 303, 979, 980 | M05, M06, DM30-DM36, D86, G35, L40, K50, K51 |
| Dementia | F00-F03, F05.1, G30 | 290.09-290.19; 293.09 |
| Diabetes I + II | 249.00, 249.06, 249.07, 249.09, 250.00, 250.06, 250.07, 250.09 | E10.0, E10.1, E10.9, E11.0, E11.1, E11.9 |
| Diabetes with end organ disease | 249.01-249.05, 249.08, 250.01-250.05, 250.08 | E10.2-E10.8, E11.2-E11.8 |
| Congestive heart failure | 427.09, 427.10, 427.11, 427.19, 428.99, 782.49 | I11.0, I13.0, I13.2, I50 |
| Peripheral vascular disease | 440-445 | I70-I73, I77 |
| Cerebrovascular disease | 432, 436-438 | I60-I62, I65-I69, G45 (Except G458 and G459), G46 |
| Ulcer disease | 530.91, 530.98, 531-534 | K22.1, K25- K28 |
| Mild liver disease | 571, 573.01, 573.04 | B18, K70.0-K70.3, K70.9, K71, K73, K74, K76.0 |
| Hemiplegia | 344 | G81, G82 |
| Moderate to severe renal disease | 403, 404, 580-583, 584, 590.09, 593.19, 753.10-753.19, 792 | I12, I13, N00-N05, N07, N11, N14, N17-N19, Q61 |
| Any tumour | 140-194 | C00-C75 |
| Leukaemia | 204-207 | C91-C95 |
| Lymphoma | 200-203, 275.59 | C81-C85, C88, C90, C96 |
| Moderate to severe liver disease | O70.00, O70.02, O70.04, O70.06, O70.08, 573.00, 456.00-456.09 | B15.0, B16.0, B16.2, B19.0, K70.4, K72, K76.6, I85 |
| Metastatic solid tumour | I95-I99 | C76-C80 |
| AIDS | O79.83 | B21-B24 |

Abbreviations: International Classification of Diseases (ICD); The Nordic Medico-Statistical Committee (NOMESCO)
